# Supplementary material for: The Chromosome-Scale Assembly of the Curcuma alismatifolia Genome Provides Insight Into Anthocyanin and Terpenoid Biosynthesis
Source: Front Plant Sci. 2022 Jun 15;13:899588. doi: 10.3389/fpls.2022.899588 (PMC9241516; doi:10.3389/fpls.2022.899588)
Supplement: Supplementary file 1 [file Data_Sheet_1.xlsx]

## Sheet: Table 1
Supplementary Table 1. Summary of sequencing data.
Library type	Sample	Develomental stage	Replication	Sequencing platform	Read length (bp)	Clean data (Gb)	Sequence coverage (×)	Application
Short reads	Leaf	Flowering	1	DNBSEQTM	2×150	123.3	119	Genome survey and base correction
Long reads	Leaf	Flowering	1	PacBio SEQUEL	19,970*	139.7	128	Genome assembly
Hi-C	Leaf	Flowering	1	DNBSEQTM	2×150	131.1	122	Chromosome construction
Transcriptome	Leaf	Flowering	1	DNBSEQTM	2×150	6.3	---	Genome annotation
Transcriptome	Flower	Flowering	1	DNBSEQTM	2×150	6.3	---	Genome annotation
Transcriptome	Root	Flowering	1	DNBSEQTM	2×150	6.3	---	Genome annotation
Transcriptome	Stem	Flowering	1	DNBSEQTM	2×150	6.3	---	Genome annotation
Transcriptome	Distal bract	Five developmental stage	3	Illumina Novaseq 6000	2×150	152.1	---	Expression analysis
Transcriptome	Rhizome	Flowering	3	Illumina Novaseq 6000	2×150	18.4	---	Expression analysis
Transcriptome	Root	Flowering	3	Illumina Novaseq 6000	2×150	19.6	---	Expression analysis
Transcriptome	Leaf	Flowering	3	Illumina Novaseq 6000	2×150	21.6	---	Expression analysis
Transcriptome	Bract	Flowering	3	Illumina Novaseq 6000	2×150	21.6	---	Expression analysis
Transcriptome	Flower	Flowering	3	Illumina Novaseq 6000	2×150	19.7	---	Expression analysis
* average read length

## Sheet: Table 2
Supplementary Table 2. The query sequences in this study.
ID	Symbol	Entry	Name
Anthocyanin biosynthesis
AT2G37040	PAL	EC:4.3.1.24	phenylalanine ammonia-lyase
AT3G10340	PAL	EC:4.3.1.24	phenylalanine ammonia-lyase
AT3G53260	PAL	EC:4.3.1.24	phenylalanine ammonia-lyase
AT5G04230	PAL	EC:4.3.1.24	phenylalanine ammonia-lyase
AT2G30490	C4H	EC:1.14.14.91	cinnamate 4-hydroxyl-ase
AT1G51680	4CL	EC:6.2.1.12	4-coumarate CoA ligase
AT5G38120	4CL	EC:6.2.1.12	4-coumarate CoA ligase
AT1G65060	4CL	EC:6.2.1.12	4-coumarate CoA ligase
AT3G21230	4CL	EC:6.2.1.12	4-coumarate CoA ligase
AT3G21240	4CL	EC:6.2.1.12	4-coumarate CoA ligase
AT5G13930	CHS	EC:2.3.1.74	chalcone synthase
AT3G55120	CHI	EC:5.5.1.6	chalcone isomerase
AT5G05270	CHI	EC:5.5.1.6	chalcone isomerase
AT3G51240	F3H	EC:1.14.11.9	flavanone 3-hydroxylase
AT5G07990	F3'H	EC:1.14.14.82	flavanone 3’-hydroxylase
NP_001234840.2	F3'5'H	EC:1.14.14.81	flavonoid 3'5' hydroxylase
AT5G42800	DFR	EC:1.1.1.219	dihydroflavonol reductase
AT4G22880	LDOX	EC:1.14.20.4	leucoanthocyanidin dioxygenase
AT4G22870	ANS	EC:1.14.20.4	anthocyanidin synthase
AT5G54060	3GT	EC:2.4.2.51	3-glucosyl transferase
AT5G54160	OMT	EC:2.1.1.68	caffeate O-methyltransferase
Terpenoid backbone biosynthesis genes
AT5G47720	AACT	EC:2.3.1.9	acetoacetyl-CoA thiolase 1
AT5G48230	AACT	EC:2.3.1.9	acetoacetyl-CoA thiolase 2
AT4G11820	HMG-S	EC:2.3.3.10	hydroxymethylglutaryl-CoA synthase
AT1G76490	HMG-R	EC:1.1.1.34	hydroxymethylglutaryl-CoA reductase
AT2G17370	HMG-R	EC:1.1.1.34	hydroxymethylglutaryl-CoA reductase
AT5G27450	MK	EC:2.7.1.36	mevalonate kinase
AT1G31910	PMK	EC:2.7.4.2	phosphomevalonate kinase
AT2G38700	MPDC	EC:4.1.1.33	mevalonate 5-diphosphate decarboxylase 1
AT3G54250	MPDC	EC:4.1.1.33	mevalonate 5-diphosphate decarboxylase 2
AT3G21500	DXS	EC:2.2.1.7	1-deoxy-D-xylulose-5-phosphate synthase
AT4G15560	DXS	EC:2.2.1.7	1-deoxy-D-xylulose-5-phosphate synthase
AT5G11380	DXS	EC:2.2.1.7	1-deoxy-D-xylulose-5-phosphate synthase
AT5G62790	DXR	EC:1.1.1.267	1-deoxy-D-xylulose-5-phosphate reductoisomerase
AT2G02500	MCT	EC:2.7.7.60	2-C-methyl-D-erythritol 4-phosphate cytidylyltransferase
AT2G26930	CMK	EC:2.7.1.148	4-diphosphocytidyl-2-C-methyl-D-erythritol kinase
AT1G63970	MDS	EC:4.6.1.12	2-C-methyl-D-erythritol 2,4-cyclodiphosphate synthase
AT5G60600	HDS	EC:1.17.7.1	(E)-4-hydroxy-3-methylbut-2-enyl-diphosphate synthase
AT4G34350	HDR	EC:1.17.7.4	4-hydroxy-3-methylbut-2-en-1-yl diphosphate reductase
AT5G16440	IPPI	EC:5.3.3.2	isopentenyl-diphosphate Delta-isomerase
AT3G02780	IPPI	EC:5.3.3.2	isopentenyl-diphosphate Delta-isomerase
AT2G34630	GPPS	EC:2.5.1.1	dimethylallyltranstransferase
AT5G47770	FPPS	EC:2.5.1.10	(2E,6E)-farnesyl diphosphate synthase
AT4G17190	FPPS	EC:2.5.1.10	(2E,6E)-farnesyl diphosphate synthase
AT4G36810	GGPPS	EC:2.5.1.29	geranylgeranyl diphosphate synthase
AT2G23800	GGPPS	EC:2.5.1.29	geranylgeranyl diphosphate synthase
AT3G14550	GGPPS	EC:2.5.1.29	geranylgeranyl diphosphate synthase
AT2G18640	GGPPS	EC:2.5.1.29	geranylgeranyl diphosphate synthase
AT1G49530	GGPPS	EC:2.5.1.29	geranylgeranyl diphosphate synthase
AT2G18620	GGPPS	EC:2.5.1.29	geranylgeranyl diphosphate synthase
AT3G29430	GGPPS	EC:2.5.1.29	geranylgeranyl diphosphate synthase
AT3G32040	GGPPS	EC:2.5.1.29	geranylgeranyl diphosphate synthase

## Sheet: Table 3
Supplementary Table 3. Primers used for real-time PCR in this study.
Name	Forward primer (5'-3')	Reverse primer (5'-3')
qCUAL04G0545	GGCTGCGTCCTCTTCATTC	ACGGTCTCCACGGTTATGC
qCUAL04G0553	GGCAGGACATTGTGGTGGT	GCAGAAGACGAGGTGGGTGA
qCUAL08G1053	CTTCACCCACGCATCCTCC	GCCTTGTTCCCGATCACC
qCUAL08G6149	ATGGCGGCGGTGATGTTT	CACCCGTCGCCCTATCCA
qCUAL08G6985	CCAGGGTTACGGGAGCAA	TTCGGCCAAATGGAGACG
qCUAL08G7151	CGCCTGCGTTCTGTTCAT	CGACGGTCTCGACGGTAAGT
qCUAL12G1210	AGCAGGCAGAGTTGGTAGCG	TTCAGTCCCTTGGCAGTCG
qCUAL13G0227	GTCGGCTCCTGGCTGGTCAT	TGCTCAACATCCCGCTCA
qCUAL15G0655	CTCCGTCCTCACCATCCA	CACCACGTTCCCGTTCTC
qActin1	AGTCTTCCCAAGTATTGTAGG	GCATCTTTCTGTCCCATC

## Sheet: Table 4
Supplementary Table 4. Summary of assembled 16 chromosomes of C. alismatifolia.
Chromosome	Length (bp)
1	45183418
2	76879678
3	51039982
4	55110081
5	48183892
6	43317527
7	56677773
8	90363989
9	39412635
10	74308558
11	55228593
12	73028710
13	54725666
14	64764939
15	67191306
16	48003927
Unplace into Chromosome	47845248
Assembly in Chromosome	943420674
Final genome assembly	991265922
The percentage of assembly in chromosome	0.9517

## Sheet: Table 5
Supplementary Table 5. Summary of BUSCO analysis results.
Type	Number	Percent (%)
Complete BUSCOs (C)	1518	94.05
Complete and single-copy BUSCOs (S)	1433	88.79
Complete and duplicated BUSCOs (D)	85	5.27
Fragmented BUSCOs (F)	38	2.35
Missing BUSCOs (M)	58	3.59
Total BUSCO groups searched	1614	100

## Sheet: Table 6
Supplementary Table 6. Summary of non-protein-coding gene annotations.
Type		Copy (n)	Average length (bp)	Total length (bp)	Percentage of genome (%)
miRNA		158	119.5	18885	0.0019
tRNA		1031	74.9	77178	0.0078
rRNA	rRNA	452	266	120232	0.0121
	18S	113	721.3	81503	0.0082
	28S	182	117.1	21321	0.0021
	5.8S	44	147.1	6473	0.0007
	5S	113	96.8	10935	0.0011
snRNA	snRNA	6520	106.5	694646	0.0702
	CD-box	6356	105.6	671493	0.0678
	HACA-box	30	135.7	4071	0.0004
	splicing	134	142.4	19082	0.0019

## Sheet: Table 7
Supplementary Table 7. GO enrichment analysis for expanded gene families
ID	Description	GeneRatio	BgRatio	P value	q value
GO:0008061	chitin binding	40/1096	55/27923	1.92076e-44	3.03277e-42
GO:0006032	chitin catabolic process	32/1096	47/27923	2.77242e-34	2.18875e-32
GO:0004568	chitinase activity	32/1096	51/27923	1.53731e-32	8.09111e-31
GO:0005537	mannose binding	20/1096	22/27923	1.36552e-26	5.39022e-25
GO:0006265	DNA topological change	25/1096	51/27923	5.02244e-22	1.58604e-20
GO:0006353	DNA-templated transcription, termination	28/1096	68/27923	6.71557e-22	1.76725e-20
GO:0015935	small ribosomal subunit	29/1096	93/27923	1.07652e-18	2.20991e-17
GO:0004553	hydrolase activity, hydrolyzing O-glycosyl compounds	45/1096	237/27923	1.11969e-18	2.20991e-17
GO:0005576	extracellular region	54/1096	367/27923	5.74705e-17	1.00825e-15
GO:0033549	MAP kinase phosphatase activity	11/1096	11/27923	3.24582e-16	4.65908e-15
GO:0043407	negative regulation of MAP kinase activity	11/1096	11/27923	3.24582e-16	4.65908e-15
GO:0001228	DNA-binding transcription activator activity, RNA polymerase II-specific	15/1096	24/27923	6.91038e-16	9.09261e-15
GO:0031054	pre-miRNA processing	13/1096	17/27923	1.00707e-15	1.22317e-14
GO:0009736	cytokinin-activated signaling pathway	19/1096	45/27923	1.525e-15	1.71992e-14
GO:0003690	double-stranded DNA binding	28/1096	112/27923	2.51334e-15	2.64562e-14
GO:0000048	peptidyltransferase activity	11/1096	12/27923	3.7562e-15	3.48873e-14
GO:0036374	glutathione hydrolase activity	11/1096	12/27923	3.7562e-15	3.48873e-14
GO:0005694	chromosome	22/1096	68/27923	6.76873e-15	5.93748e-14
GO:0042765	GPI-anchor transamidase complex	13/1096	21/27923	7.43594e-14	6.17945e-13
GO:0003917	DNA topoisomerase type I (single strand cut, ATP-independent) activity	14/1096	26/27923	1.18042e-13	9.31907e-13
GO:0007059	chromosome segregation	13/1096	22/27923	1.75226e-13	1.31749e-12
GO:0008177	succinate dehydrogenase (ubiquinone) activity	11/1096	15/27923	3.83221e-13	2.63081e-12
GO:0022900	electron transport chain	11/1096	15/27923	3.83221e-13	2.63081e-12
GO:0031053	primary miRNA processing	13/1096	24/27923	8.17187e-13	5.37623e-12
GO:0006751	glutathione catabolic process	11/1096	17/27923	3.23158e-12	1.9625e-11
GO:0010026	trichome differentiation	11/1096	17/27923	3.23158e-12	1.9625e-11
GO:0016602	CCAAT-binding factor complex	15/1096	38/27923	4.87651e-12	2.85176e-11
GO:0003725	double-stranded RNA binding	13/1096	27/27923	5.88342e-12	3.20331e-11
GO:0005880	nuclear microtubule	13/1096	27/27923	5.88342e-12	3.20331e-11
GO:0003691	double-stranded telomeric DNA binding	11/1096	18/27923	8.01407e-12	4.21793e-11
GO:0010090	trichome morphogenesis	13/1096	28/27923	1.05876e-11	5.39265e-11
GO:0016255	attachment of GPI anchor to protein	11/1096	20/27923	3.93409e-11	1.94116e-10
GO:0019748	secondary metabolic process	9/1096	12/27923	4.23498e-11	2.02631e-10
GO:0004525	ribonuclease III activity	13/1096	31/27923	5.2258e-11	2.42684e-10
GO:0030422	production of siRNA involved in RNA interference	13/1096	32/27923	8.48517e-11	3.8279e-10
GO:0008373	sialyltransferase activity	9/1096	14/27923	3.58874e-10	1.57401e-09
GO:0005730	nucleolus	38/1096	307/27923	4.43747e-10	1.89366e-09
GO:0003918	DNA topoisomerase type II (double strand cut, ATP-hydrolyzing) activity	11/1096	25/27923	8.71239e-10	3.62011e-09
GO:0008234	cysteine-type peptidase activity	17/1096	69/27923	9.56839e-10	3.87384e-09
GO:0009740	gibberellic acid mediated signaling pathway	12/1096	32/27923	1.37455e-09	5.42586e-09
GO:0019843	rRNA binding	23/1096	134/27923	2.4892e-09	9.58614e-09
GO:0000781	chromosome, telomeric region	11/1096	28/27923	3.7659e-09	1.40538e-08
GO:0009134	nucleoside diphosphate catabolic process	9/1096	17/27923	3.91632e-09	1.40538e-08
GO:0017110	nucleoside-diphosphatase activity	9/1096	17/27923	3.91632e-09	1.40538e-08
GO:0006338	chromatin remodeling	13/1096	42/27923	4.32508e-09	1.51757e-08
GO:0051225	spindle assembly	13/1096	43/27923	5.97701e-09	2.05161e-08
GO:0000062	fatty-acyl-CoA binding	9/1096	19/27923	1.38601e-08	4.55924e-08
GO:0016308	1-phosphatidylinositol-4-phosphate 5-kinase activity	9/1096	19/27923	1.38601e-08	4.55924e-08
GO:0008138	protein tyrosine/serine/threonine phosphatase activity	11/1096	34/27923	4.03987e-08	1.30179e-07
GO:0005085	guanyl-nucleotide exchange factor activity	13/1096	52/27923	7.47287e-08	2.35985e-07
GO:0005315	inorganic phosphate transmembrane transporter activity	10/1096	29/27923	8.44517e-08	2.6146e-07
GO:0005543	phospholipid binding	11/1096	38/27923	1.4709e-07	4.46631e-07
GO:0015250	water channel activity	10/1096	32/27923	2.44303e-07	7.19688e-07
GO:0008408	3'-5' exonuclease activity	9/1096	25/27923	2.47689e-07	7.19688e-07
GO:0008289	lipid binding	21/1096	145/27923	2.50691e-07	7.19688e-07
GO:0051301	cell division	24/1096	187/27923	3.59814e-07	1.01451e-06
GO:0009649	entrainment of circadian clock	6/1096	10/27923	6.61485e-07	1.83237e-06
GO:0005764	lysosome	11/1096	44/27923	7.55283e-07	2.05613e-06
GO:0004725	protein tyrosine phosphatase activity	11/1096	45/27923	9.6431e-07	2.58067e-06
GO:0009734	auxin-activated signaling pathway	22/1096	171/27923	1.04736e-06	2.75621e-06
GO:0032440	2-alkenal reductase [NAD(P)+] activity	6/1096	11/27923	1.4067e-06	3.64115e-06
GO:0006357	regulation of transcription by RNA polymerase II	34/1096	355/27923	1.79471e-06	4.57056e-06
GO:0006396	RNA processing	16/1096	102/27923	2.26303e-06	5.67176e-06
GO:0005749	mitochondrial respiratory chain complex II, succinate dehydrogenase complex (ubiquinone)	6/1096	12/27923	2.71957e-06	6.60625e-06
GO:0008409	5'-3' exonuclease activity	6/1096	12/27923	2.71957e-06	6.60625e-06
GO:0004185	serine-type carboxypeptidase activity	10/1096	44/27923	6.12127e-06	1.46442e-05
GO:0006817	phosphate ion transport	10/1096	45/27923	7.59469e-06	1.78979e-05
GO:0046982	protein heterodimerization activity	19/1096	155/27923	1.13492e-05	2.63526e-05
GO:0051603	proteolysis involved in cellular protein catabolic process	11/1096	60/27923	1.9001e-05	4.34807e-05
GO:0003844	1,4-alpha-glucan branching enzyme activity	5/1096	10/27923	1.97276e-05	4.38717e-05
GO:0043169	cation binding	5/1096	10/27923	1.97276e-05	4.38717e-05
GO:0007091	metaphase/anaphase transition of mitotic cell cycle	5/1096	11/27923	3.49951e-05	7.56923e-05
GO:0071944	cell periphery	5/1096	11/27923	3.49951e-05	7.56923e-05
GO:0000974	Prp19 complex	7/1096	25/27923	3.63577e-05	7.75768e-05
GO:0007049	cell cycle	16/1096	129/27923	4.72935e-05	9.95653e-05
GO:0006334	nucleosome assembly	11/1096	67/27923	5.54642e-05	0.000113734
GO:0044772	mitotic cell cycle phase transition	11/1096	67/27923	5.54642e-05	0.000113734
GO:0048527	lateral root development	5/1096	12/27923	5.8049e-05	0.000117508
GO:0015074	DNA integration	8/1096	36/27923	6.23461e-05	0.000124609
GO:0009536	plastid	16/1096	135/27923	8.22317e-05	0.000162299
GO:0008146	sulfotransferase activity	6/1096	20/27923	8.70485e-05	0.000169685
GO:0008017	microtubule binding	20/1096	195/27923	9.02273e-05	0.000171576
GO:0044613	nuclear pore central transport channel	5/1096	13/27923	9.12782e-05	0.000171576
GO:0051513	regulation of monopolar cell growth	5/1096	13/27923	9.12782e-05	0.000171576
GO:0004386	helicase activity	17/1096	155/27923	0.000131741	0.00024472
GO:0060090	molecular adaptor activity	5/1096	14/27923	0.0001374	0.000252264
GO:0000155	phosphorelay sensor kinase activity	7/1096	31/27923	0.000161874	0.000293781
GO:0009909	regulation of flower development	8/1096	41/27923	0.000165448	0.000296857
GO:0005743	mitochondrial inner membrane	18/1096	174/27923	0.000178582	0.000316821
GO:0030430	host cell cytoplasm	7/1096	32/27923	0.000200223	0.000350212
GO:0009738	abscisic acid-activated signaling pathway	11/1096	77/27923	0.000201839	0.000350212
GO:0048511	rhythmic process	6/1096	23/27923	0.000204933	0.000351715
GO:0000079	regulation of cyclin-dependent protein serine/threonine kinase activity	11/1096	78/27923	0.000226755	0.000384982
GO:0016620	oxidoreductase activity, acting on the aldehyde or oxo group of donors, NAD or NADP as acceptor	7/1096	33/27923	0.000245579	0.000408164
GO:0099402	plant organ development	7/1096	33/27923	0.000245579	0.000408164
GO:0009904	chloroplast accumulation movement	6/1096	24/27923	0.000264213	0.00043008
GO:0010052	guard cell differentiation	6/1096	24/27923	0.000264213	0.00043008
GO:0009933	meristem structural organization	5/1096	16/27923	0.000280746	0.00045233
GO:0006260	DNA replication	13/1096	107/27923	0.000290739	0.000463698
GO:0004527	exonuclease activity	7/1096	34/27923	0.000298849	0.000471867
GO:0004197	cysteine-type endopeptidase activity	11/1096	83/27923	0.000393858	0.000609687
GO:0016538	cyclin-dependent protein serine/threonine kinase regulator activity	11/1096	83/27923	0.000393858	0.000609687
GO:0017196	N-terminal peptidyl-methionine acetylation	4/1096	10/27923	0.000409984	0.000628489
GO:0006405	RNA export from nucleus	5/1096	18/27923	0.000515797	0.000768317
GO:0032981	mitochondrial respiratory chain complex I assembly	5/1096	18/27923	0.000515797	0.000768317
GO:0040029	regulation of gene expression, epigenetic	5/1096	18/27923	0.000515797	0.000768317
GO:0000139	Golgi membrane	27/1096	343/27923	0.00052341	0.000772371
GO:0005982	starch metabolic process	4/1096	11/27923	0.000624264	0.000896073
GO:0008023	transcription elongation factor complex	4/1096	11/27923	0.000624264	0.000896073
GO:0043966	histone H3 acetylation	4/1096	11/27923	0.000624264	0.000896073
GO:0016592	mediator complex	8/1096	52/27923	0.000890396	0.00126657
GO:0010305	leaf vascular tissue pattern formation	4/1096	12/27923	0.000907372	0.00127919
GO:0005978	glycogen biosynthetic process	5/1096	21/27923	0.00111072	0.00155201
GO:0006099	tricarboxylic acid cycle	11/1096	94/27923	0.00114026	0.00157931
GO:0009055	electron transfer activity	14/1096	141/27923	0.001341	0.00184119
GO:0042626	ATPase-coupled transmembrane transporter activity	15/1096	157/27923	0.00135798	0.00184844
GO:0003887	DNA-directed DNA polymerase activity	6/1096	33/27923	0.00160862	0.00215248
GO:0006261	DNA-dependent DNA replication	6/1096	33/27923	0.00160862	0.00215248
GO:0000981	DNA-binding transcription factor activity, RNA polymerase II-specific	27/1096	371/27923	0.00167424	0.00222145
GO:0009501	amyloplast	5/1096	23/27923	0.00172089	0.00226432
GO:0000786	nucleosome	13/1096	131/27923	0.00197146	0.00257259
GO:0005635	nuclear envelope	5/1096	25/27923	0.00254623	0.00329539
GO:0005680	anaphase-promoting complex	5/1096	27/27923	0.00362605	0.00465476
GO:0016747	acyltransferase activity, transferring groups other than amino-acyl groups	15/1096	174/27923	0.00368928	0.00467386
GO:0007031	peroxisome organization	4/1096	17/27923	0.00372974	0.00467386
GO:0080156	mitochondrial mRNA modification	4/1096	17/27923	0.00372974	0.00467386
GO:0000373	Group II intron splicing	5/1096	28/27923	0.00427374	0.00525038
GO:0031145	anaphase-promoting complex-dependent catabolic process	5/1096	28/27923	0.00427374	0.00525038
GO:0005615	extracellular space	11/1096	111/27923	0.00428956	0.00525038
GO:0004402	histone acetyltransferase activity	4/1096	18/27923	0.00464801	0.00555982
GO:0016161	beta-amylase activity	4/1096	18/27923	0.00464801	0.00555982
GO:0102229	amylopectin maltohydrolase activity	4/1096	18/27923	0.00464801	0.00555982
GO:0032502	developmental process	7/1096	54/27923	0.00498832	0.00592202
GO:0000307	cyclin-dependent protein kinase holoenzyme complex	11/1096	114/27923	0.00524881	0.00618477
GO:0009691	cytokinin biosynthetic process	5/1096	30/27923	0.00580914	0.00679432
GO:0004364	glutathione transferase activity	6/1096	43/27923	0.00635276	0.00737549
GO:0000976	transcription cis-regulatory region binding	16/1096	205/27923	0.0071971	0.00829478
GO:0015293	symporter activity	10/1096	104/27923	0.00777699	0.00889816
GO:0004867	serine-type endopeptidase inhibitor activity	3/1096	11/27923	0.007854	0.00892162
GO:0006325	chromatin organization	6/1096	46/27923	0.00884038	0.00997036
GO:0016709	oxidoreductase activity, acting on paired donors, with incorporation or reduction of molecular oxygen, NAD(P)H as one donor, and incorporation of one atom of oxygen	5/1096	34/27923	0.00997212	0.011167
GO:0009960	endosperm development	3/1096	12/27923	0.0101695	0.0113079
GO:0008380	RNA splicing	9/1096	93/27923	0.0108236	0.011951
GO:0009931	calcium-dependent protein serine/threonine kinase activity	7/1096	64/27923	0.0125055	0.0137122
GO:0045263	proton-transporting ATP synthase complex, coupling factor F(o)	3/1096	13/27923	0.0128394	0.0139812
GO:0004683	calmodulin-dependent protein kinase activity	7/1096	65/27923	0.0135538	0.014658
GO:0050660	flavin adenine dinucleotide binding	11/1096	131/27923	0.0142751	0.0153331
GO:0000278	mitotic cell cycle	5/1096	38/27923	0.0158243	0.016769
GO:0017056	structural constituent of nuclear pore	5/1096	38/27923	0.0158243	0.016769
GO:0052689	carboxylic ester hydrolase activity	4/1096	26/27923	0.0177206	0.0186532
GO:0006397	mRNA processing	14/1096	190/27923	0.0181188	0.0189461
GO:0004805	trehalose-phosphatase activity	5/1096	40/27923	0.0194611	0.0202158
GO:0043547	positive regulation of GTPase activity	6/1096	55/27923	0.0203629	0.0210144
GO:0006749	glutathione metabolic process	6/1096	56/27923	0.0220737	0.0226319
GO:0006368	transcription elongation from RNA polymerase II promoter	4/1096	28/27923	0.0228215	0.0232477
GO:0003779	actin binding	10/1096	123/27923	0.0231639	0.0234453
GO:0009506	plasmodesma	14/1096	198/27923	0.0248265	0.024968
GO:0048364	root development	4/1096	29/27923	0.0256729	0.0256558
GO:0005681	spliceosomal complex	8/1096	93/27923	0.0297994	0.0295923
GO:0000272	polysaccharide catabolic process	4/1096	31/27923	0.0319915	0.0313744
GO:0045261	proton-transporting ATP synthase complex, catalytic core F(1)	4/1096	31/27923	0.0319915	0.0313744
GO:0046777	protein autophosphorylation	9/1096	114/27923	0.0356119	0.0347095
GO:0006364	rRNA processing	9/1096	119/27923	0.0448662	0.043461

## Sheet: Table 8
Supplementary Table 8. KEGG enrichment analysis for expanded gene families
ID	Description	GeneRatio	BgRatio	P value	q value
ko00520	Amino sugar and nucleotide sugar metabolism	40/271	272/7912	2.05307e-15	4.75449e-14
ko00430	Taurine and hypotaurine metabolism	11/271	28/7912	7.96539e-10	9.22308e-09
ko00563	Glycosylphosphatidylinositol (GPI)-anchor biosynthesis	13/271	44/7912	1.34634e-09	1.03928e-08
ko00590	Arachidonic acid metabolism	11/271	33/7912	6.16147e-09	3.56717e-08
ko00480	Glutathione metabolism	17/271	114/7912	2.78758e-07	1.29109e-06
ko03008	Ribosome biogenesis in eukaryotes	17/271	134/7912	2.85468e-06	1.10181e-05
ko00460	Cyanoamino acid metabolism	11/271	73/7912	3.34886e-05	0.000110789
ko00020	Citrate cycle (TCA cycle)	11/271	91/7912	0.000258045	0.000746971
ko04120	Ubiquitin mediated proteolysis	19/271	231/7912	0.000345881	0.000803442
ko02010	ABC transporters	8/271	52/7912	0.000346941	0.000803442
ko00190	Oxidative phosphorylation	18/271	237/7912	0.00125556	0.00264329
ko00740	Riboflavin metabolism	5/271	26/7912	0.00165419	0.0031923
ko00945	Stilbenoid, diarylheptanoid and gingerol biosynthesis	6/271	41/7912	0.0025042	0.00446092
ko00230	Purine metabolism	14/271	180/7912	0.00345028	0.00570723
ko00562	Inositol phosphate metabolism	9/271	108/7912	0.0115427	0.0178203
ko00240	Pyrimidine metabolism	9/271	115/7912	0.0168956	0.0244541
ko04070	Phosphatidylinositol signaling system	10/271	137/7912	0.0189748	0.025848
ko00195	Photosynthesis	7/271	84/7912	0.0246133	0.0316662
ko00941	Flavonoid biosynthesis	6/271	68/7912	0.028396	0.03461

## Sheet: Table 9
Supplementary Table 9. GO enrichment analysis for contracted gene families
ID	Description	GeneRatio	BgRatio	P value	q value
GO:0008194	UDP-glycosyltransferase activity	24/429	87/27923	1.10992e-23	1.22675e-21
GO:0000786	nucleosome	24/429	131/27923	3.88668e-19	2.1479e-17
GO:0016705	oxidoreductase activity, acting on paired donors, with incorporation or reduction of molecular oxygen	30/429	256/27923	6.84083e-18	2.5203e-16
GO:0046982	protein heterodimerization activity	24/429	155/27923	2.27052e-17	6.27382e-16
GO:0004497	monooxygenase activity	25/429	214/27923	4.37847e-15	9.67872e-14
GO:0005506	iron ion binding	31/429	357/27923	9.21182e-15	1.69691e-13
GO:0030145	manganese ion binding	13/429	40/27923	1.83211e-14	2.89281e-13
GO:0005618	cell wall	25/429	238/27923	5.18992e-14	7.17028e-13
GO:0000977	RNA polymerase II transcription regulatory region sequence-specific DNA binding	15/429	72/27923	2.55764e-13	3.14096e-12
GO:0048046	apoplast	22/429	197/27923	4.99832e-13	5.52445e-12
GO:0020037	heme binding	31/429	425/27923	9.84894e-13	9.89607e-12
GO:0006334	nucleosome assembly	13/429	67/27923	2.65318e-11	2.35112e-10
GO:0009414	response to water deprivation	11/429	42/27923	2.76537e-11	2.35112e-10
GO:0048544	recognition of pollen	14/429	89/27923	8.85611e-11	6.99167e-10
GO:0009536	plastid	16/429	135/27923	3.17468e-10	2.33924e-09
GO:0009579	thylakoid	11/429	69/27923	8.12158e-09	5.6103e-08
GO:0008757	S-adenosylmethionine-dependent methyltransferase activity	9/429	41/27923	9.94644e-09	6.46673e-08
GO:0045944	positive regulation of transcription by RNA polymerase II	15/429	156/27923	2.061e-08	1.26553e-07
GO:0009733	response to auxin	11/429	87/27923	9.73548e-08	5.6633e-07
GO:0005773	vacuole	14/429	152/27923	1.04948e-07	5.79978e-07
GO:0030247	polysaccharide binding	9/429	55/27923	1.49274e-07	7.85653e-07
GO:0030865	cortical cytoskeleton organization	5/429	10/27923	1.97804e-07	9.9375e-07
GO:0005774	vacuolar membrane	15/429	215/27923	1.35386e-06	6.50595e-06
GO:0007264	small GTPase mediated signal transduction	6/429	25/27923	1.75608e-06	8.08722e-06
GO:0005777	peroxisome	11/429	117/27923	1.99787e-06	8.83271e-06
GO:0006749	glutathione metabolic process	8/429	56/27923	2.16737e-06	9.21353e-06
GO:0004364	glutathione transferase activity	7/429	43/27923	3.8469e-06	1.57476e-05
GO:0004857	enzyme inhibitor activity	9/429	81/27923	4.30711e-06	1.70017e-05
GO:0005576	extracellular region	19/429	367/27923	4.85946e-06	1.85206e-05
GO:0005938	cell cortex	5/429	18/27923	6.0756e-06	2.23838e-05
GO:0043086	negative regulation of catalytic activity	5/429	19/27923	8.14156e-06	2.90277e-05
GO:0008199	ferric iron binding	4/429	10/27923	1.07229e-05	3.70365e-05
GO:0004553	hydrolase activity, hydrolyzing O-glycosyl compounds	14/429	237/27923	2.03029e-05	6.8e-05
GO:0006879	cellular iron ion homeostasis	4/429	12/27923	2.46656e-05	7.88121e-05
GO:0005730	nucleolus	16/429	307/27923	2.49572e-05	7.88121e-05
GO:0006880	intracellular sequestering of iron ion	4/429	13/27923	3.51958e-05	0.000108057
GO:0008198	ferrous iron binding	4/429	14/27923	4.86768e-05	0.000145407
GO:0033179	proton-transporting V-type ATPase, V0 domain	4/429	19/27923	0.000177347	0.000515828
GO:0000978	RNA polymerase II cis-regulatory region sequence-specific DNA binding	13/429	260/27923	0.000212904	0.000588337
GO:0006730	one-carbon metabolic process	5/429	36/27923	0.000212922	0.000588337
GO:0009506	plasmodesma	11/429	198/27923	0.000263668	0.000710787
GO:0008360	regulation of cell shape	5/429	39/27923	0.000313127	0.000824019
GO:0009734	auxin-activated signaling pathway	10/429	171/27923	0.000331298	0.000851562
GO:0016762	xyloglucan:xyloglucosyl transferase activity	5/429	43/27923	0.000497828	0.00125052
GO:0004650	polygalacturonase activity	6/429	66/27923	0.000530006	0.00127485
GO:0006559	L-phenylalanine catabolic process	3/429	11/27923	0.000542114	0.00127485
GO:0032440	2-alkenal reductase [NAD(P)+] activity	3/429	11/27923	0.000542114	0.00127485
GO:0010411	xyloglucan metabolic process	5/429	44/27923	0.00055464	0.00127713
GO:0007166	cell surface receptor signaling pathway	4/429	26/27923	0.000628298	0.00141721
GO:0007015	actin filament organization	5/429	46/27923	0.000682701	0.00150913
GO:0008409	5'-3' exonuclease activity	3/429	12/27923	0.000714597	0.00151888
GO:0034440	lipid oxidation	3/429	12/27923	0.000714597	0.00151888
GO:0042546	cell wall biogenesis	5/429	49/27923	0.000914641	0.00190739
GO:0017108	5'-flap endonuclease activity	3/429	15/27923	0.00142813	0.00292308
GO:0106310	protein serine kinase activity	12/429	288/27923	0.00179411	0.00354101
GO:0106311	protein threonine kinase activity	12/429	288/27923	0.00179411	0.00354101
GO:0061631	ubiquitin conjugating enzyme activity	5/429	60/27923	0.00228283	0.00442654
GO:0031410	cytoplasmic vesicle	5/429	61/27923	0.00245581	0.00467986
GO:0006869	lipid transport	5/429	62/27923	0.00263811	0.00494205
GO:0015276	ligand-gated ion channel activity	3/429	20/27923	0.00338015	0.00622659
GO:0009408	response to heat	4/429	41/27923	0.00355108	0.00643422
GO:0006357	regulation of transcription by RNA polymerase II	13/429	355/27923	0.00361389	0.00644243
GO:0015078	proton transmembrane transporter activity	4/429	42/27923	0.00387798	0.00680348
GO:0038023	signaling receptor activity	4/429	43/27923	0.00422466	0.00729588
GO:0008168	methyltransferase activity	12/429	322/27923	0.00442475	0.00752387
GO:0006468	protein phosphorylation	10/429	243/27923	0.00458179	0.00767285
GO:0016740	transferase activity	15/429	454/27923	0.00480572	0.00792774
GO:0031408	oxylipin biosynthetic process	3/429	23/27923	0.00507528	0.0082493
GO:0000981	DNA-binding transcription factor activity, RNA polymerase II-specific	13/429	371/27923	0.00520655	0.00834
GO:0016747	acyltransferase activity, transferring groups other than amino-acyl groups	8/429	174/27923	0.00564817	0.00891817
GO:0019901	protein kinase binding	5/429	76/27923	0.00632824	0.00985123
GO:0005856	cytoskeleton	5/429	78/27923	0.00705418	0.0108288
GO:0022625	cytosolic large ribosomal subunit	7/429	151/27923	0.00898033	0.0135967
GO:0000209	protein polyubiquitination	5/429	91/27923	0.0132335	0.0197655
GO:0016702	oxidoreductase activity, acting on single donors with incorporation of molecular oxygen, incorporation of two atoms of oxygen	3/429	34/27923	0.0151465	0.0223212
GO:0005509	calcium ion binding	12/429	387/27923	0.0173344	0.0252093
GO:0006284	base-excision repair	3/429	40/27923	0.0233815	0.033562
GO:0006073	cellular glucan metabolic process	2/429	16/27923	0.0245123	0.034734
GO:0042542	response to hydrogen peroxide	2/429	17/27923	0.0275024	0.0384777
GO:0005654	nucleoplasm	3/429	46/27923	0.0335993	0.0464201
GO:0042626	ATPase-coupled transmembrane transporter activity	6/429	157/27923	0.034751	0.0474185

## Sheet: Table 10
Supplementary Table 10. KEGG enrichment analysis for contracted gene families
ID	Description	GeneRatio	BgRatio	P value	q value
ko00960	Tropane, piperidine and pyridine alkaloid biosynthesis	10/160	32/7912	3.79798e-10	8.39553e-09
ko04075	Plant hormone signal transduction	31/160	443/7912	7.73816e-10	8.5527e-09
ko00908	Zeatin biosynthesis	8/160	49/7912	5.23405e-06	3.85667e-05
ko04145	Phagosome	11/160	144/7912	0.000151211	0.000835639
ko03450	Non-homologous end-joining	3/160	10/7912	0.000877377	0.00387893
ko00480	Glutathione metabolism	8/160	114/7912	0.00210567	0.00775772
ko04712	Circadian rhythm - plant	7/160	93/7912	0.00267894	0.0084598
ko04016	MAPK signaling pathway - plant	13/160	278/7912	0.00407399	0.0112571
ko00591	Linoleic acid metabolism	3/160	21/7912	0.00826044	0.0202888
ko00040	Pentose and glucuronate interconversions	7/160	133/7912	0.0180481	0.0373048
ko04120	Ubiquitin mediated proteolysis	10/160	231/7912	0.0185636	0.0373048
ko02010	ABC transporters	4/160	52/7912	0.0205555	0.0378654

[truncated: 3 more sheets: Table 11, Table 12, Table 13]
